# Supplementary material for: Predictive Simulations of Musculoskeletal Function and Jumping Performance in a Generalized Bird
Source: Integr Org Biol. 2021 Apr 15;3(1):obab006. doi: 10.1093/iob/obab006 (PMC8341896; doi:10.1093/iob/obab006)
Supplement: obab006_Supplementary_Data [file obab006_supplementary_data.zip]

Archive with 9 entries (9 files):
- Cover Image Caption.doc
- Dutch Abstract.doc
- French Abstract.docx
- German Abstract.docx
- Movie S1.mp4
- Movie S2.mp4
- Movie S3.mp4
- Revised Supplementary Material_ammendedPJB.pdf
- Supplementary Code.zip
